# Supplementary material
Source: MDPI journal article supplement (https://www.mdpi.com/1999-4907/13/11/1806)
Supplement: s1 [file s1]

Supplementary Figure S2. Gene Ontology (GO) analysis of the categories for immature and mature fruits and seeds from *Carpotroche brasiliensis*.

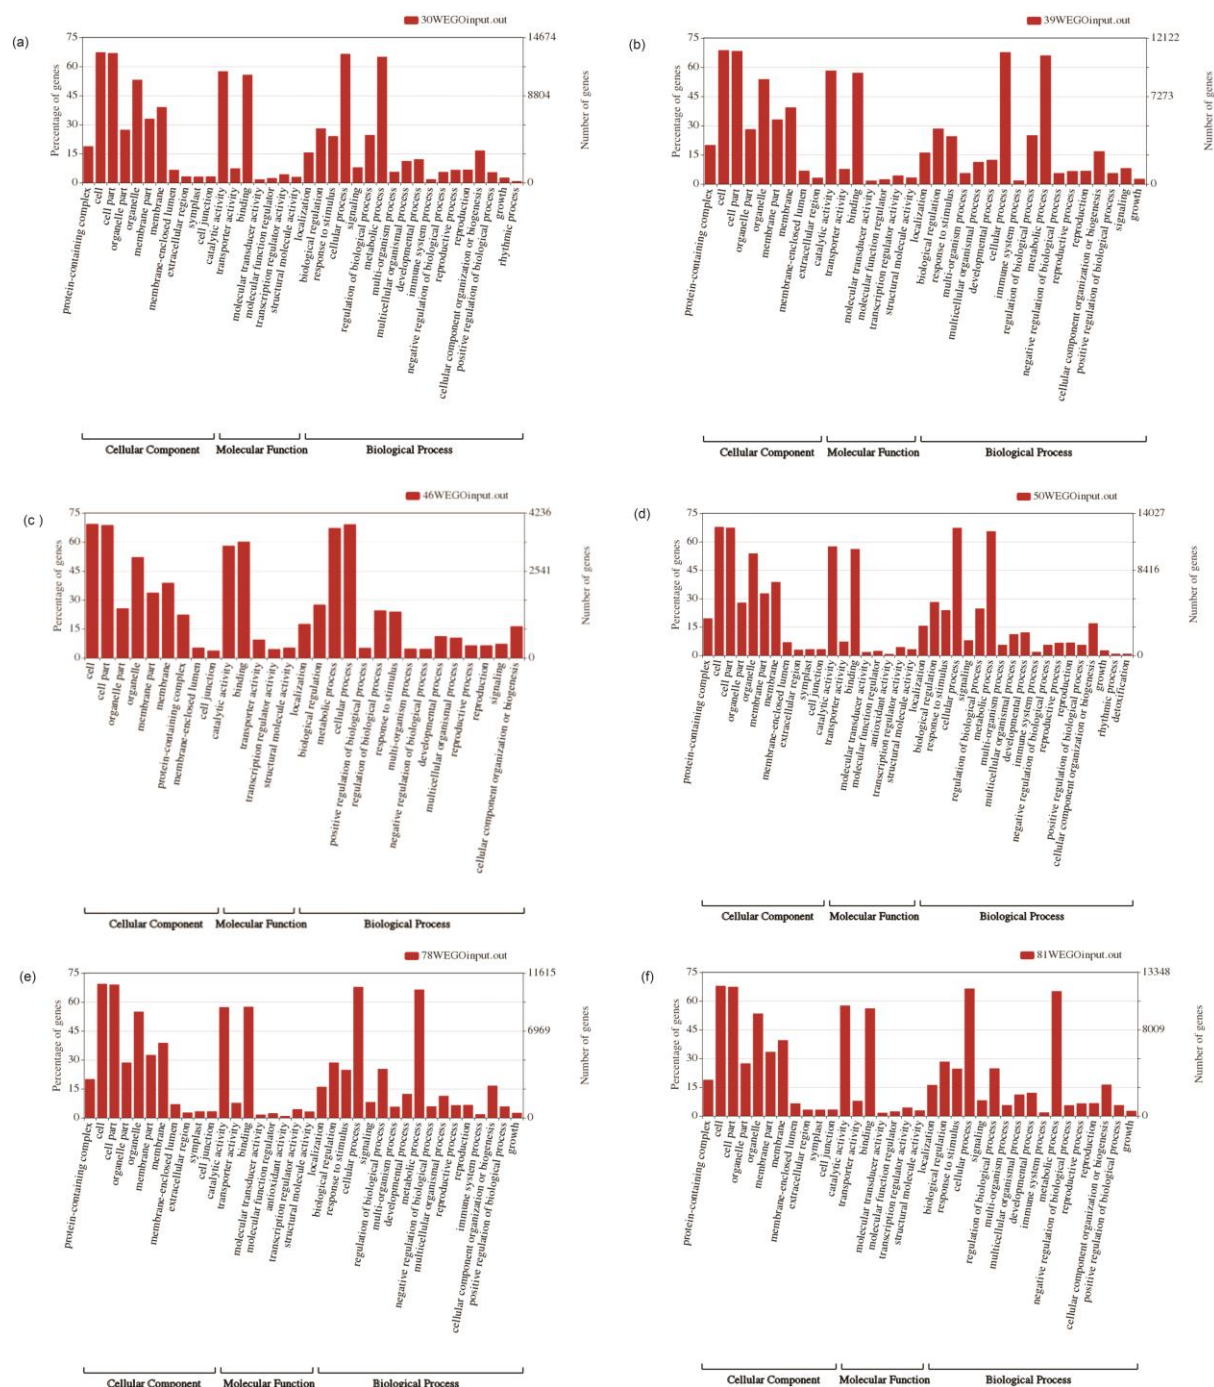

Supplementary Figure S2. Gene ontology (GO) categories for immature e mature fruits and seeds from *Carpotroche brasiliensis*. The identified proteins were classified into cellular component, molecular function, and biological process by WEGO according to their GO signatures. The number of genes denotes that of proteins with GO annotations. a) Immature fruit. b) Mature fruit. c) Immature seed. d) Immature fruit. e) immature seed. f) mature seed.
