# Supplementary material
Source: MDPI journal article supplement (https://www.mdpi.com/1999-4907/13/11/1806)
Supplement: s1 [file s1]

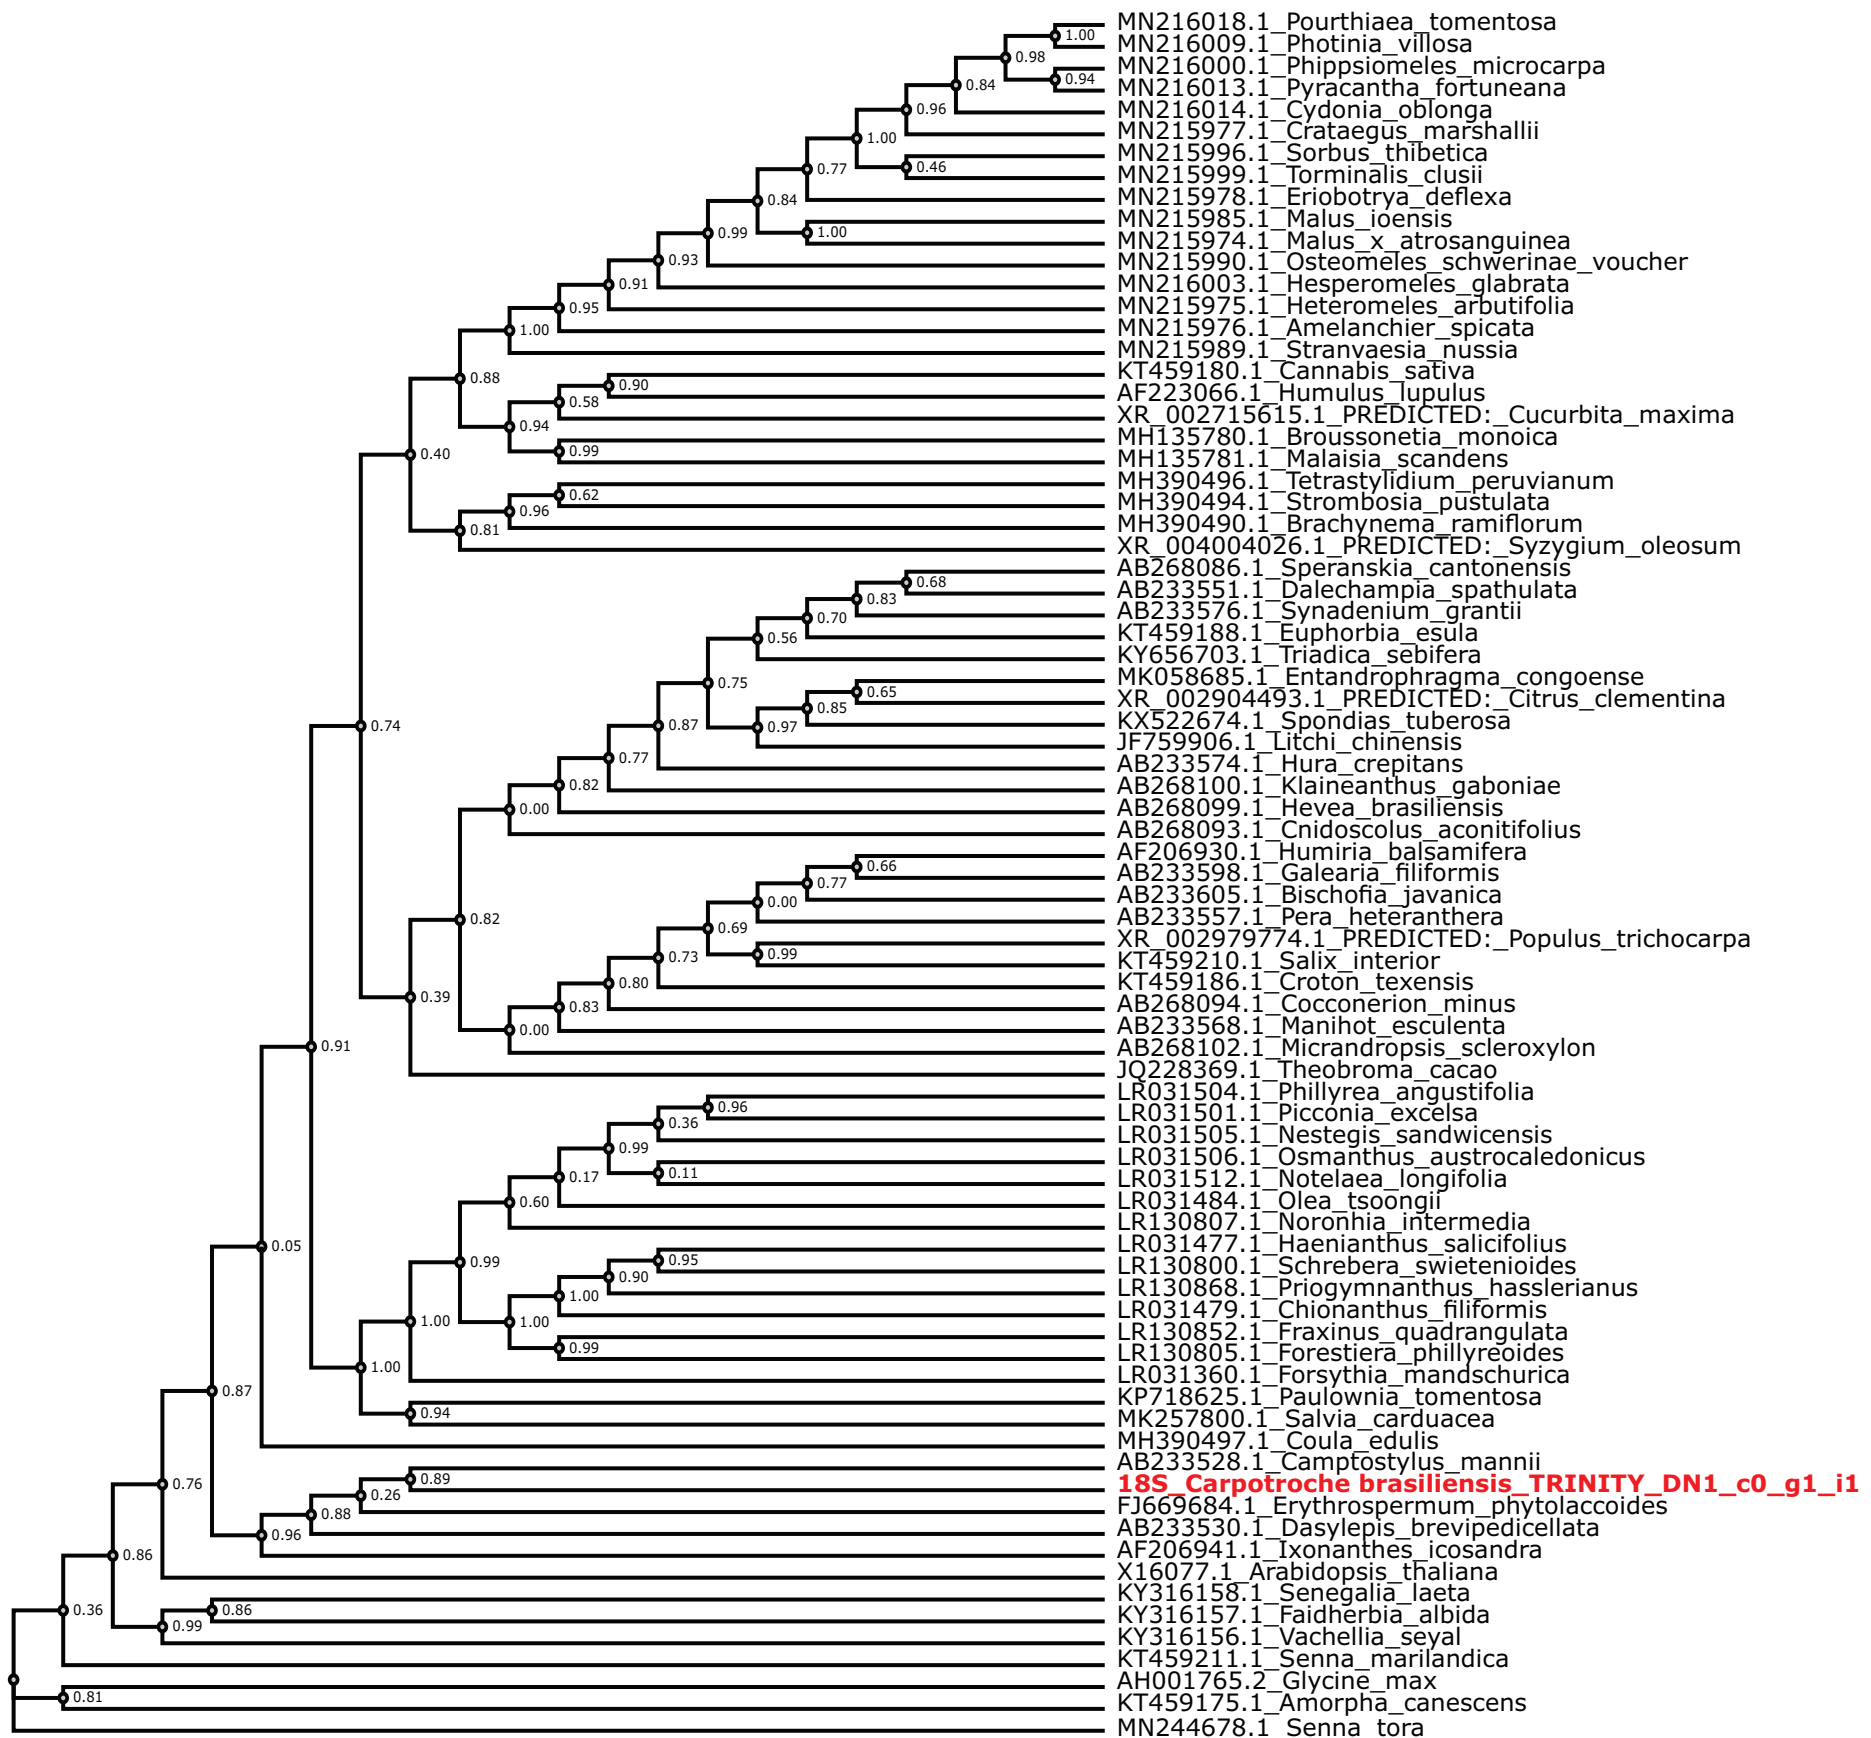

Supplementary Figure S3. Phylogeny based on the Maximum likelihood method with 1000 bootstrap replicates and 18S gene sequences. In red we highlight *Carpotroche brasiliensis*.
