# Supplementary material
Source: MDPI journal article supplement (https://www.mdpi.com/1999-4907/13/11/1806)
Supplement: s1 [file s1]

Letícia Maróstica de Vasconcelos<sup>1\*</sup>, Flora Bittencourt<sup>2</sup>, Ramon Oliveira Vidal<sup>3</sup>, Edson Mario de Andrade Silva<sup>4</sup>, Eduardo Almeida Costa<sup>5</sup>, Fabienne Micheli<sup>6</sup>, Matias Kirst<sup>7</sup>, Carlos Priminho Pirovani<sup>8</sup> and Fernanda Amato Gaiotto<sup>8</sup>

Supplementary Table S1. Data from samples and sequencing of RNA extraction from tissues of *Carpotroche brasiliensis*.

| SAMPLE | TISSUE       | SEX      | X      | Y       |
|--------|--------------|----------|--------|---------|
| 1      | flower bud   | ♀        | 474516 | 8442692 |
| 6      | flower bud   | ♀        | 474488 | 8442827 |
| 10     | flower bud   | ♀        | 474485 | 8442837 |
| 25     | flower bud   | ♀        | 474516 | 8442692 |
| 26     | flower bud   | ♀        | 474503 | 8442674 |
| 67     | flower bud   | ♀        | 474480 | 8442830 |
| 2      | flower bud   | ♂        | 474488 | 8442641 |
| 5      | flower bud   | ♂        | 474494 | 8442646 |
| 14     | flower bud   | ♂        | 474497 | 8442662 |
| 17     | flower bud   | ♂        | 474481 | 8442821 |
| 28     | flower bud   | ♂        | 474480 | 8442825 |
| 35     | flower bud   | ♂        | 474484 | 8442842 |
| 7      | flower       | ♀        | 474485 | 8442837 |
| 29     | flower       | ♂        | 474488 | 8442641 |
| 39     | big fruit    | ---      | 474480 | 8442830 |
| 46     | small fruit  | ---      | 474484 | 8442845 |
| 30     | small fruit  | ---      | 474493 | 8442731 |
| 50     | medium fruit | ---      | 474503 | 8442674 |
| 65     | leaf         | ♀        | 474489 | 8442663 |
| 72     | leaf         | ♂        | 474482 | 8442880 |
| 74     | root         | seedling | 474497 | 8442727 |
| 21     | root         | seedling | 474482 | 8442863 |
| 78     | small seed   | ---      | 474484 | 8442845 |
| 81     | big seed     | ---      | 474498 | 8442677 |

Supplementary Table S2. Assembly statistics of *C. brasiliensis* transcriptome by RNA-Seq and TransDecoder

| Assembly statistics       | RNA-Seq       | TransDecoder |
|---------------------------|---------------|--------------|
| Number of unigenes        | 263,562       | 12,908       |
| Total transcripts         | 312,768       | 38,841       |
| Total size (bp)           | 1,733,379,762 | 34,444,803   |
| Medium contig length (bp) | 340           | 708          |
| Average length (bp)       | 554,34        | 886,82       |
| N50 length (bp)           | 637           | 1122         |
| GC contents (%)           | 42.68         | 46.46        |

Supplementary Table S3. Assessment of transcriptome quality by BUSCO.

|                                    | <i>Arabidopsis</i><br>Embryophyta | <i>Solanum lycopersicum</i> ;<br>Solanaceae |
|------------------------------------|-----------------------------------|---------------------------------------------|
| Complete BUSCOs                    | 1059<br>(73,5%)                   | 1516<br>(49,6%)                             |
| Complete and single-copy<br>BUSCOs | 572                               | 721                                         |
| Complete and duplicated<br>BUSCOs  | 487                               | 795                                         |
| Fragmented BUSCOs                  | 161                               | 273                                         |
| Missing BUSCOs                     | 220                               | 1263                                        |

Supplementary Table S4. Enzymes involved in fatty acid biosynthesis and catabolism identified by the annotation of *Carpotroche brasiliensis* transcriptome.

| Enzyme                                                       | Symbol                 | Interprot | EC number | # Of protein |
|--------------------------------------------------------------|------------------------|-----------|-----------|--------------|
| <b>Fatty acid biosynthesis</b>                               |                        |           |           |              |
| Biotin carboxylase                                           | BC                     | IPR005482 | 6.3.4.14  | 8            |
| Acetyl-coenzyme A carboxylase carboxyl transferase subunit   | CT                     | IPR001095 | 6.4.1.2   | 24           |
| Malonyl-CoA:ACP transacylase                                 | MAT                    | IPR016036 | 2.3.1.39  | 5            |
| 3-Oxoacyl-[acyl-carrier-protein] synthase I                  | KASI                   |           | 2.3.1.41  | 5            |
| 3-Oxoacyl-[acyl-carrier-protein] synthase II                 | KASII                  | IPR017568 | 2.3.1.179 | 2            |
| 3-Oxoacyl-[acyl-carrier-protein] synthase III                | KASIII                 | IPR013747 | 2.3.1.180 | 3            |
| 3-Oxoacyl-[acyl-carrier-protein] reductase                   | KAR                    | IPR011284 | 1.1.1.100 | 39           |
| 3- Hydroxyacyl-ACP dehydratase                               | HAD                    | IPR010084 | 4.2.1.59  | 10           |
| Enoyl-(Acyl carrier protein) reductase                       | EAR                    | IPR014358 | 1.3.1.9   | 17           |
| Acyl-ACP thioesterase                                        | FAT                    | IPR002864 | 3.1.2.14  | 7            |
| <b>Very-long-chain fatty acid elongation</b>                 |                        |           |           |              |
| Long chain acyl-CoA synthetase                               | LACS                   |           | 6.2.1.3   | 80           |
| 3-Hydroxyacyl-CoA dehydrogenase                              | HCD                    | IPR006108 | 4.2.1.134 | 20           |
| <b>Fatty acid desaturation</b>                               |                        |           |           |              |
| Stearoyl-ACP desaturase                                      | SAD, D <sup>9</sup> D  |           | 1.14.19.2 | 4            |
| Δ <sup>9</sup> - desaturase                                  | FAD5, D <sup>9</sup> D |           | 1.14.19.1 | 2            |
| <b>TAG biosynthesis</b>                                      |                        |           |           |              |
| 1-Acyl-sn-glycerol-3-phosphate acyltransferase               | LPAAT                  |           | 2.3.1.51  | 11           |
| Phosphatidate phosphatase                                    | PAP                    |           | 3.1.3.4   | 19           |
| Diacylglycerol O-acyltransferase                             | DGAT                   | IPR027251 | 2.3.1.20  | 8            |
| Phospholipid:diacylglycerol acyltransferase                  | PDAT                   | IPR003386 | 2.3.1.158 | 2            |
| Phosphatidylcholine:diacylglycerol cholinephosphotransferase | PDCT                   |           | 2.7.8.2   | 3            |
| Lysophospholipid acyltransferase                             | LPCAT                  |           | 2.3.1.23  | 2            |
| Phospholipase A                                              | PLA                    | IPR033113 | 3.1.1.4   | 39           |
| <b>Lipid storage</b>                                         |                        |           |           |              |
| Oleosin                                                      | Oleosin                | —         | —         | 4            |
| Caleosin                                                     | Caleosin               | —         | —         | 3            |
