# Supplementary material
Source: MDPI journal article supplement (https://www.mdpi.com/1999-4907/13/11/1806)
Supplement: s1 [file s1]

Supplementary Figure S1. Schematic overview of the structure of *Carpotroche brasiliensis* RNA-Seq data analysis.

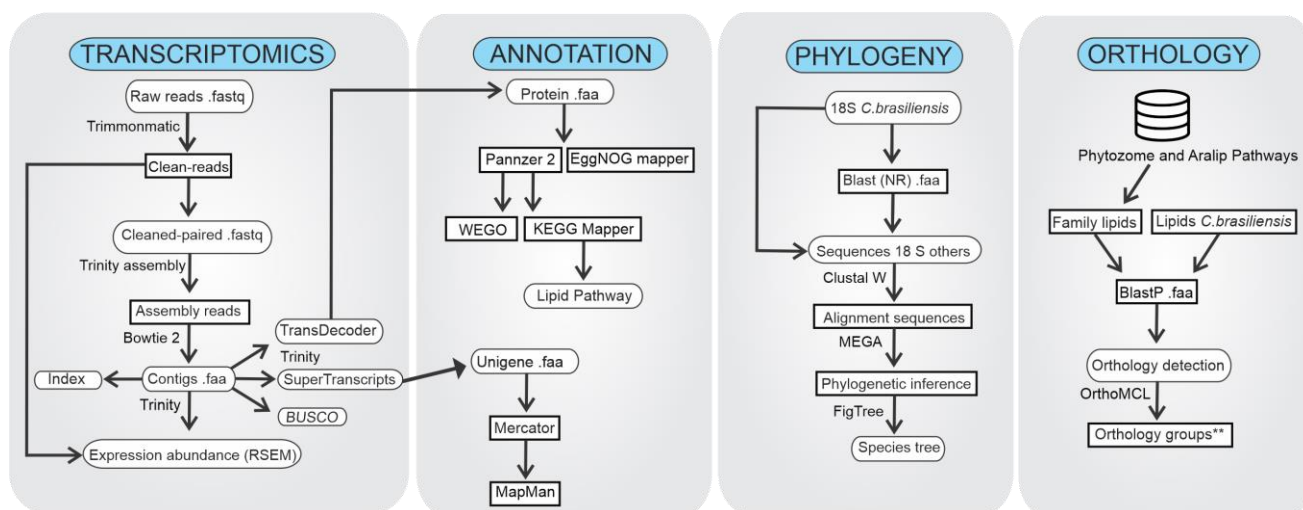

Supplementary Figure S1. Workflow of RNA-Seq data analysis of *Carpotroche brasiliensis*. The general pipeline includes transcriptome assembly and annotation, evolutionary analysis, and gene orthology analysis.
